# Supplementary material
Source: Royal Society of Chemistry journal article supplement (doi:10.1039/d6qi00395h)
Supplement: d6qi00395h1.pdf [file d6qi00395h1.pdf]

## SUPPORTING INFORMATION

### **Coordination Modulated Nonplanar Penta-Graphene as the Electronic Structural Lever for CO<sub>2</sub>RR Activity and Selectivity in Dual-Atom Catalysts**

*Yueyue Shao,<sup>a,b</sup> Huaying Zhong<sup>a</sup> and Jia Zhou<sup>a,b,\*</sup>*

<sup>a</sup> State Key Lab of Urban-rural Water Resource and Environment, School of Science, Harbin Institute of Technology, Shenzhen 518055, China

<sup>b</sup> School of Chemistry and Chemical Engineering, Harbin Institute of Technology, Harbin 150001, China

\*Corresponding author E-mail:

[jiazhou@hit.edu.cn](mailto:jiazhou@hit.edu.cn)

## Supplementary Computational Section

The free-energy changes of the thermodynamic reaction pathway were evaluated using four elementary steps. The overall two-electron CO<sub>2</sub> reduction reactions are written as follows:

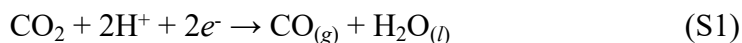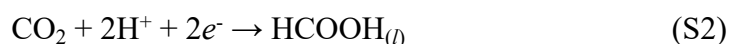

The corresponding elementary reactions and their Gibbs free-energy changes ( $\Delta G_1$ ,  $\Delta G_2$ ,  $\Delta G_3$ ,  $\Delta G_4$ ) of CO<sub>2</sub>RR to CO (Equations S3-S6) and HCOOH (Equations S7-S10) are listed as follows:

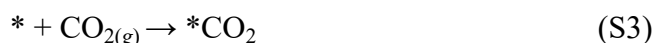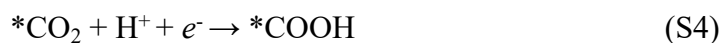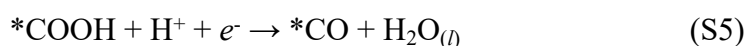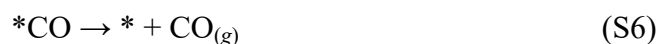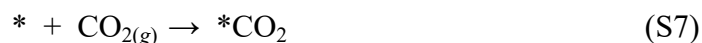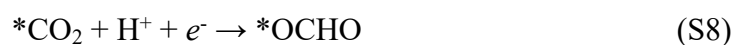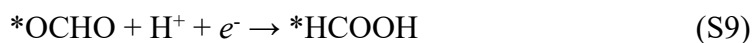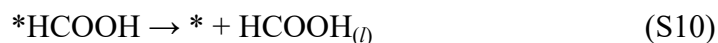

where \* refers to the active site on the surface of catalysts, the subscripts *g* and *l* stand for gas and liquid phases, respectively.

Formation energy  $E_f$  was defined as follows<sup>1</sup>:

$$E_f = (E_{PG-2TM} - E_{PG} - 2E_{TM})/2 \quad (\text{S11})$$

In the above equation,  $E_{PG-2TM}$  and  $E_{PG}$  represent the total energy of the TM embedded structure and that of the PG substrate without embedded metal, respectively, while  $E_{TM}$  denotes the total energy per atom of the corresponding metal in its bulk phase.

The DOS projected onto the *d*-state that interacts with the adsorbate state can be characterized by the moments of the *d*-state DOS. The *d*-band center ( $\epsilon_d$ ) is calculated by<sup>2</sup>:

$$\varepsilon_d = \frac{\int_{-\infty}^{\infty} n_d(\varepsilon) \varepsilon d\varepsilon}{\int_{-\infty}^{\infty} n_d(\varepsilon) d\varepsilon} \quad (\text{S12})$$

where  $\varepsilon$  and  $n_d(\varepsilon)$  are the energy of  $d$ -state DOS and electronic density of  $d$ -state DOS, respectively.

The zero-point energy (ZPE) was calculated according to:

$$E_{ZPE} = \sum_{i=1}^{3N} \frac{h\nu_i}{2} \quad (\text{S13})$$

The entropy change for adsorbed intermediates was calculated within the harmonic approximation:

$$\Delta S_{ads}(0 \rightarrow T, P^0) = S_{vib} = \sum_{i=1}^{3N} \left[ \frac{N_A h \nu_i}{T (e^{h\nu_i/k_B T} - 1)} - R \ln(1 - e^{-h\nu_i/k_B T}) \right] \quad (\text{S14})$$

Where  $\nu_i$  is DFT-calculated normal-mode frequency for species of  $3N$  degree of freedom ( $N$  = number of atoms) adsorbed on PG-based DACs,  $N_A$  is the Avogadro's constant,  $h$  is the Planck's constant,  $R$  is the ideal gas constant.

## Supplementary Tables

**Table S1.** Summary of structural parameters (lattice length  $a$ ,  $b$  and distance between two metal atoms) for 36 PG-based DACs, and the bond lengths of metal atoms in their bulk phase ( $D_{m-m}$ ).<sup>3</sup>

| PG-based DACs                                                          | $a$ (Å) | $b$ (Å) | $d_{m-m}$ (Å) | $D_{m-m}$ (Å) |
|------------------------------------------------------------------------|---------|---------|---------------|---------------|
| Sc <sub>2</sub> NM-sp <sup>2</sup> sp <sup>3</sup>                     | 14.51   | 14.52   | 2.96          | 3.22          |
| Ti <sub>2</sub> NM-sp <sup>2</sup> sp <sup>3</sup>                     | 14.51   | 14.51   | 2.88          | 2.98          |
| V <sub>2</sub> FM-sp <sup>2</sup> sp <sup>3</sup>                      | 14.48   | 14.48   | 2.60          | 2.58          |
| Mn <sub>2</sub> AFM-sp <sup>2</sup> sp <sup>3</sup>                    | 14.50   | 14.51   | 2.55          | 2.47          |
| Mn <sub>2</sub> FM-sp <sup>2</sup> sp <sup>3</sup>                     | 14.49   | 14.50   | 2.72          | 2.47          |
| Fe <sub>2</sub> AFM-sp <sup>2</sup> sp <sup>3</sup>                    | 14.52   | 14.51   | 2.10          | 2.43          |
| Fe <sub>2</sub> FM-sp <sup>2</sup> sp <sup>3</sup>                     | 14.52   | 14.51   | 2.03          | 2.43          |
| Sc <sub>2</sub> NM-sp <sup>2</sup> sp <sup>3</sup> sp <sup>2</sup> -c  | 14.43   | 14.51   | 2.93          | 3.22          |
| Ti <sub>2</sub> NM-sp <sup>2</sup> sp <sup>3</sup> sp <sup>2</sup> -c  | 14.43   | 14.50   | 2.60          | 2.98          |
| V <sub>2</sub> NM-sp <sup>2</sup> sp <sup>3</sup> sp <sup>2</sup> -c   | 14.47   | 14.50   | 2.20          | 2.58          |
| Cr <sub>2</sub> AFM-sp <sup>2</sup> sp <sup>3</sup> sp <sup>2</sup> -c | 14.44   | 14.48   | 2.24          | 2.46          |
| Cr <sub>2</sub> FM-sp <sup>2</sup> sp <sup>3</sup> sp <sup>2</sup> -c  | 14.43   | 14.50   | 2.40          | 2.46          |
| Mn <sub>2</sub> AFM-sp <sup>2</sup> sp <sup>3</sup> sp <sup>2</sup> -c | 14.46   | 14.48   | 2.37          | 2.47          |
| Mn <sub>2</sub> FM-sp <sup>2</sup> sp <sup>3</sup> sp <sup>2</sup> -c  | 14.44   | 14.48   | 2.44          | 2.47          |
| Fe <sub>2</sub> AFM-sp <sup>2</sup> sp <sup>3</sup> sp <sup>2</sup> -c | 14.44   | 14.80   | 2.25          | 2.43          |
| Fe <sub>2</sub> FM-sp <sup>2</sup> sp <sup>3</sup> sp <sup>2</sup> -c  | 14.46   | 14.48   | 2.27          | 2.43          |
| Co <sub>2</sub> AFM-sp <sup>2</sup> sp <sup>3</sup> sp <sup>2</sup> -c | 14.46   | 14.48   | 2.24          | 2.48          |
| Co <sub>2</sub> FM-sp <sup>2</sup> sp <sup>3</sup> sp <sup>2</sup> -c  | 14.43   | 14.48   | 2.20          | 2.48          |
| Ni <sub>2</sub> NM-sp <sup>2</sup> sp <sup>3</sup> sp <sup>2</sup> -c  | 14.47   | 14.46   | 2.38          | 2.49          |
| Cu <sub>2</sub> NM-sp <sup>2</sup> sp <sup>3</sup> sp <sup>2</sup> -c  | 14.48   | 14.45   | 2.52          | 2.57          |
| Ti <sub>2</sub> NM-sp <sup>2</sup> sp <sup>3</sup> sp <sup>2</sup> -t  | 14.54   | 14.54   | 2.60          | 2.98          |
| V <sub>2</sub> AFM-sp <sup>2</sup> sp <sup>3</sup> sp <sup>2</sup> -t  | 14.53   | 14.42   | 2.34          | 2.58          |
| V <sub>2</sub> FM-sp <sup>2</sup> sp <sup>3</sup> sp <sup>2</sup> -t   | 14.52   | 14.42   | 2.37          | 2.58          |
| Mn <sub>2</sub> AFM-sp <sup>2</sup> sp <sup>3</sup> sp <sup>2</sup> -t | 14.50   | 14.47   | 2.31          | 2.47          |
| Mn <sub>2</sub> FM-sp <sup>2</sup> sp <sup>3</sup> sp <sup>2</sup> -t  | 14.52   | 14.46   | 2.38          | 2.47          |
| Co <sub>2</sub> NM-sp <sup>2</sup> sp <sup>3</sup> sp <sup>2</sup> -t  | 14.50   | 14.46   | 2.30          | 2.43          |
| Ti <sub>2</sub> FM-sp <sup>3</sup> sp <sup>2</sup> sp <sup>3</sup>     | 14.53   | 14.47   | 2.66          | 2.43          |
| V <sub>2</sub> NM-sp <sup>3</sup> sp <sup>2</sup> sp <sup>3</sup>      | 14.54   | 14.56   | 2.48          | 2.58          |
| Cr <sub>2</sub> AFM-sp <sup>3</sup> sp <sup>2</sup> sp <sup>3</sup>    | 14.53   | 14.53   | 2.58          | 2.46          |
| Cr <sub>2</sub> FM-sp <sup>3</sup> sp <sup>2</sup> sp <sup>3</sup>     | 14.48   | 14.54   | 2.59          | 2.46          |
| Mn <sub>2</sub> AFM-sp <sup>3</sup> sp <sup>2</sup> sp <sup>3</sup>    | 14.49   | 14.53   | 2.31          | 2.47          |
| Mn <sub>2</sub> FM-sp <sup>3</sup> sp <sup>2</sup> sp <sup>3</sup>     | 14.48   | 14.51   | 2.49          | 2.47          |
| Fe <sub>2</sub> AFM-sp <sup>3</sup> sp <sup>2</sup> sp <sup>3</sup>    | 14.50   | 14.51   | 2.23          | 2.43          |
| Fe <sub>2</sub> FM-sp <sup>3</sup> sp <sup>2</sup> sp <sup>3</sup>     | 14.51   | 14.51   | 2.22          | 2.43          |
| Co <sub>2</sub> NM-sp <sup>3</sup> sp <sup>2</sup> sp <sup>3</sup>     | 14.53   | 14.53   | 2.30          | 2.43          |
| Ni <sub>2</sub> NM-sp <sup>3</sup> sp <sup>2</sup> sp <sup>3</sup>     | 14.53   | 14.53   | 2.22          | 2.49          |

**Table S2.** Free energy corrections including zero-point energy (ZPE) and entropy (S) for gas-phase species.

| <b>Molecular</b> | <b>ZPE (eV)</b> | <b>T × S (eV)</b> |
|------------------|-----------------|-------------------|
| CO <sub>2</sub>  | 0.31            | 0.66              |
| CO               | 0.14            | 0.67              |
| H <sub>2</sub>   | 0.31            | 0.40              |
| H <sub>2</sub> O | 0.57            | 0.66              |
| HCOOH            | 0.90            | 1.02              |

**Table S3.** Overpotential for 35 catalytically evaluable PG-based DACs to produce CO, HCOOH and H<sub>2</sub> with two-electron transfer reactions in aqueous electrolytes.

| PG-based DACs                                                          | $\eta^{\text{CO}}$ (V) | $\eta^{\text{HCOOH}}$ (V) | $\eta^{\text{H}_2}$ (V) |
|------------------------------------------------------------------------|------------------------|---------------------------|-------------------------|
| Sc <sub>2</sub> NM-sp <sup>2</sup> sp <sup>3</sup>                     | 0.621                  | 0.504                     | 1.329                   |
| Ti <sub>2</sub> NM-sp <sup>2</sup> sp <sup>3</sup>                     | 0.857                  | 0.659                     | 0.209                   |
| V <sub>2</sub> FM-sp <sup>2</sup> sp <sup>3</sup>                      | 0.960                  | 0.591                     | 0.215                   |
| Mn <sub>2</sub> AFM-sp <sup>2</sup> sp <sup>3</sup>                    | 0.782                  | 0.193                     | 0.382                   |
| Mn <sub>2</sub> FM-sp <sup>2</sup> sp <sup>3</sup>                     | 0.933                  | 0.157                     | 0.366                   |
| Fe <sub>2</sub> AFM-sp <sup>2</sup> sp <sup>3</sup>                    | 0.914                  | 1.108                     | 1.556                   |
| Fe <sub>2</sub> FM-sp <sup>2</sup> sp <sup>3</sup>                     | 0.752                  | 0.752                     | 1.396                   |
| Sc <sub>2</sub> NM-sp <sup>2</sup> sp <sup>3</sup> sp <sup>2</sup> -c  | 0.375                  | 0.676                     | 0.585                   |
| Ti <sub>2</sub> NM-sp <sup>2</sup> sp <sup>3</sup> sp <sup>2</sup> -c  | 0.845                  | 0.660                     | 0.194                   |
| V <sub>2</sub> NM-sp <sup>2</sup> sp <sup>3</sup> sp <sup>2</sup> -c   | 0.917                  | 0.749                     | 0.239                   |
| Cr <sub>2</sub> AFM-sp <sup>2</sup> sp <sup>3</sup> sp <sup>2</sup> -c | 0.896                  | 0.420                     | 0.291                   |
| Cr <sub>2</sub> FM-sp <sup>2</sup> sp <sup>3</sup> sp <sup>2</sup> -c  | 0.978                  | 0.464                     | 0.184                   |
| Mn <sub>2</sub> AFM-sp <sup>2</sup> sp <sup>3</sup> sp <sup>2</sup> -c | 0.569                  | 0.265                     | 0.275                   |
| Mn <sub>2</sub> FM-sp <sup>2</sup> sp <sup>3</sup> sp <sup>2</sup> -c  | 1.147                  | 0.276                     | 0.292                   |
| Fe <sub>2</sub> AFM-sp <sup>2</sup> sp <sup>3</sup> sp <sup>2</sup> -c | 1.320                  | 0.138                     | 0.165                   |
| Fe <sub>2</sub> FM-sp <sup>2</sup> sp <sup>3</sup> sp <sup>2</sup> -c  | 1.097                  | 0.091                     | 0.286                   |
| Co <sub>2</sub> AFM-sp <sup>2</sup> sp <sup>3</sup> sp <sup>2</sup> -c | 1.347                  | 0.233                     | 0.043                   |
| Co <sub>2</sub> FM-sp <sup>2</sup> sp <sup>3</sup> sp <sup>2</sup> -c  | 1.418                  | 0.167                     | 0.018                   |
| Ni <sub>2</sub> NM-sp <sup>2</sup> sp <sup>3</sup> sp <sup>2</sup> -c  | 0.734                  | 0.913                     | 0.131                   |
| Cu <sub>2</sub> NM-sp <sup>2</sup> sp <sup>3</sup> sp <sup>2</sup> -c  | 0.527                  | 1.047                     | 0.615                   |
| V <sub>2</sub> AFM-sp <sup>2</sup> sp <sup>3</sup> sp <sup>2</sup> -t  | 1.491                  | 0.776                     | 0.094                   |
| V <sub>2</sub> FM-sp <sup>2</sup> sp <sup>3</sup> sp <sup>2</sup> -t   | 1.468                  | 0.930                     | 0.076                   |
| Mn <sub>2</sub> AFM-sp <sup>2</sup> sp <sup>3</sup> sp <sup>2</sup> -t | 1.381                  | 0.309                     | 0.198                   |
| Mn <sub>2</sub> FM-sp <sup>2</sup> sp <sup>3</sup> sp <sup>2</sup> -t  | 1.609                  | 0.357                     | 0.073                   |
| Co <sub>2</sub> NM-sp <sup>2</sup> sp <sup>3</sup> sp <sup>2</sup> -t  | 1.480                  | 0.463                     | 0.228                   |
| Ti <sub>2</sub> FM-sp <sup>3</sup> sp <sup>2</sup> sp <sup>3</sup>     | 0.952                  | 0.647                     | 0.268                   |
| V <sub>2</sub> NM-sp <sup>3</sup> sp <sup>2</sup> sp <sup>3</sup>      | 0.439                  | 0.362                     | 0.702                   |
| Cr <sub>2</sub> AFM-sp <sup>3</sup> sp <sup>2</sup> sp <sup>3</sup>    | 0.588                  | 0.314                     | 0.835                   |
| Cr <sub>2</sub> FM-sp <sup>3</sup> sp <sup>2</sup> sp <sup>3</sup>     | 0.555                  | 0.362                     | 0.405                   |
| Mn <sub>2</sub> AFM-sp <sup>3</sup> sp <sup>2</sup> sp <sup>3</sup>    | 0.556                  | 0.166                     | 0.570                   |
| Mn <sub>2</sub> FM-sp <sup>3</sup> sp <sup>2</sup> sp <sup>3</sup>     | 0.605                  | 0.179                     | 0.593                   |
| Fe <sub>2</sub> AFM-sp <sup>3</sup> sp <sup>2</sup> sp <sup>3</sup>    | 0.631                  | 0.151                     | 0.598                   |
| Fe <sub>2</sub> FM-sp <sup>3</sup> sp <sup>2</sup> sp <sup>3</sup>     | 0.632                  | 0.178                     | 0.708                   |
| Co <sub>2</sub> NM-sp <sup>3</sup> sp <sup>2</sup> sp <sup>3</sup>     | 0.896                  | 0.253                     | 1.395                   |
| Ni <sub>2</sub> NM-sp <sup>3</sup> sp <sup>2</sup> sp <sup>3</sup>     | 1.137                  | 0.577                     | 0.404                   |

**Table S4.** The 16 selected descriptors of 35 catalytically evaluable PG-based DACs retained for detailed CO<sub>2</sub>RR analysis.

| PG-based DACs                                                          | $Q_{TM}$ | $\epsilon_d$ | ICOHP  | Z  |
|------------------------------------------------------------------------|----------|--------------|--------|----|
| Sc <sub>2</sub> NM-sp <sup>2</sup> sp <sup>3</sup>                     | 1.700    | 1.489        | -0.103 | 21 |
| Ti <sub>2</sub> NM-sp <sup>2</sup> sp <sup>3</sup>                     | 1.571    | 1.129        | -0.136 | 22 |
| V <sub>2</sub> FM-sp <sup>2</sup> sp <sup>3</sup>                      | 1.418    | 0.220        | -0.328 | 23 |
| Mn <sub>2</sub> AFM-sp <sup>2</sup> sp <sup>3</sup>                    | 1.076    | -0.674       | -0.173 | 25 |
| Mn <sub>2</sub> FM-sp <sup>2</sup> sp <sup>3</sup>                     | 1.098    | -0.494       | -0.077 | 25 |
| Fe <sub>2</sub> AFM-sp <sup>2</sup> sp <sup>3</sup>                    | 0.801    | -0.783       | -1.465 | 26 |
| Fe <sub>2</sub> FM-sp <sup>2</sup> sp <sup>3</sup>                     | 0.766    | -0.644       | -1.581 | 26 |
| Sc <sub>2</sub> NM-sp <sup>2</sup> sp <sup>3</sup> sp <sup>2</sup> -c  | 1.639    | 1.692        | -0.131 | 21 |
| Ti <sub>2</sub> NM-sp <sup>2</sup> sp <sup>3</sup> sp <sup>2</sup> -c  | 1.520    | 0.888        | -0.369 | 22 |
| V <sub>2</sub> NM-sp <sup>2</sup> sp <sup>3</sup> sp <sup>2</sup> -c   | 1.257    | 0.412        | -1.094 | 23 |
| Cr <sub>2</sub> AFM-sp <sup>2</sup> sp <sup>3</sup> sp <sup>2</sup> -c | 1.084    | 0.056        | -0.749 | 24 |
| Cr <sub>2</sub> FM-sp <sup>2</sup> sp <sup>3</sup> sp <sup>2</sup> -c  | 1.131    | 0.070        | -0.422 | 24 |
| Mn <sub>2</sub> AFM-sp <sup>2</sup> sp <sup>3</sup> sp <sup>2</sup> -c | 0.922    | -0.775       | -0.361 | 25 |
| Mn <sub>2</sub> FM-sp <sup>2</sup> sp <sup>3</sup> sp <sup>2</sup> -c  | 0.998    | -0.572       | -0.213 | 25 |
| Fe <sub>2</sub> AFM-sp <sup>2</sup> sp <sup>3</sup> sp <sup>2</sup> -c | 0.800    | -1.601       | -0.328 | 26 |
| Fe <sub>2</sub> FM-sp <sup>2</sup> sp <sup>3</sup> sp <sup>2</sup> -c  | 0.831    | -1.410       | -0.331 | 26 |
| Co <sub>2</sub> AFM-sp <sup>2</sup> sp <sup>3</sup> sp <sup>2</sup> -c | 0.643    | -1.575       | -0.183 | 27 |
| Co <sub>2</sub> FM-sp <sup>2</sup> sp <sup>3</sup> sp <sup>2</sup> -c  | 0.639    | -1.382       | -0.206 | 27 |
| Ni <sub>2</sub> NM-sp <sup>2</sup> sp <sup>3</sup> sp <sup>2</sup> -c  | 0.581    | -2.367       | -0.044 | 28 |
| Cu <sub>2</sub> NM-sp <sup>2</sup> sp <sup>3</sup> sp <sup>2</sup> -c  | 0.550    | -2.400       | 0.004  | 29 |
| V <sub>2</sub> AFM-sp <sup>2</sup> sp <sup>3</sup> sp <sup>2</sup> -t  | 1.192    | 0.332        | -0.732 | 23 |
| V <sub>2</sub> FM-sp <sup>2</sup> sp <sup>3</sup> sp <sup>2</sup> -t   | 1.205    | 0.362        | -0.665 | 23 |
| Mn <sub>2</sub> AFM-sp <sup>2</sup> sp <sup>3</sup> sp <sup>2</sup> -t | 0.864    | -0.745       | -0.620 | 25 |
| Mn <sub>2</sub> FM-sp <sup>2</sup> sp <sup>3</sup> sp <sup>2</sup> -t  | 0.868    | -0.630       | -0.344 | 25 |
| Co <sub>2</sub> NM-sp <sup>2</sup> sp <sup>3</sup> sp <sup>2</sup> -t  | 0.595    | -1.980       | -0.192 | 27 |
| Ti <sub>2</sub> FM-sp <sup>3</sup> sp <sup>2</sup> sp <sup>3</sup>     | 1.644    | 1.134        | -0.220 | 22 |
| V <sub>2</sub> NM-sp <sup>3</sup> sp <sup>2</sup> sp <sup>3</sup>      | 1.453    | 0.141        | -0.432 | 23 |
| Cr <sub>2</sub> AFM-sp <sup>3</sup> sp <sup>2</sup> sp <sup>3</sup>    | 1.269    | -0.447       | -0.185 | 24 |
| Cr <sub>2</sub> FM-sp <sup>3</sup> sp <sup>2</sup> sp <sup>3</sup>     | 1.261    | -0.514       | -0.223 | 24 |
| Mn <sub>2</sub> AFM-sp <sup>3</sup> sp <sup>2</sup> sp <sup>3</sup>    | 1.045    | -0.824       | -0.478 | 25 |
| Mn <sub>2</sub> FM-sp <sup>3</sup> sp <sup>2</sup> sp <sup>3</sup>     | 1.069    | -0.842       | -0.127 | 25 |
| Fe <sub>2</sub> AFM-sp <sup>3</sup> sp <sup>2</sup> sp <sup>3</sup>    | 0.771    | -1.420       | -0.283 | 26 |
| Fe <sub>2</sub> FM-sp <sup>3</sup> sp <sup>2</sup> sp <sup>3</sup>     | 0.786    | -1.388       | -0.321 | 26 |
| Co <sub>2</sub> NM-sp <sup>3</sup> sp <sup>2</sup> sp <sup>3</sup>     | 0.684    | -2.638       | -0.086 | 27 |
| Ni <sub>2</sub> NM-sp <sup>3</sup> sp <sup>2</sup> sp <sup>3</sup>     | 0.562    | -2.750       | -0.084 | 28 |

| <b>PG-based DACs</b>                                                   | <b><math>P</math></b> | <b><math>IE_1</math></b> | <b><math>W_M</math></b> | <b><math>E_M</math></b> |
|------------------------------------------------------------------------|-----------------------|--------------------------|-------------------------|-------------------------|
| Sc <sub>2</sub> NM-sp <sup>2</sup> sp <sup>3</sup>                     | 1.36                  | 6.56                     | 3.50                    | 3.90                    |
| Ti <sub>2</sub> NM-sp <sup>2</sup> sp <sup>3</sup>                     | 1.54                  | 6.82                     | 4.33                    | 4.85                    |
| V <sub>2</sub> FM-sp <sup>2</sup> sp <sup>3</sup>                      | 1.63                  | 6.74                     | 4.30                    | 5.31                    |
| Mn <sub>2</sub> AFM-sp <sup>2</sup> sp <sup>3</sup>                    | 1.55                  | 7.43                     | 4.10                    | 2.92                    |
| Mn <sub>2</sub> FM-sp <sup>2</sup> sp <sup>3</sup>                     | 1.55                  | 7.43                     | 4.10                    | 2.92                    |
| Fe <sub>2</sub> AFM-sp <sup>2</sup> sp <sup>3</sup>                    | 1.83                  | 7.87                     | 4.81                    | 4.28                    |
| Fe <sub>2</sub> FM-sp <sup>2</sup> sp <sup>3</sup>                     | 1.83                  | 7.87                     | 4.81                    | 4.28                    |
| Sc <sub>2</sub> NM-sp <sup>2</sup> sp <sup>3</sup> sp <sup>2</sup> -c  | 1.36                  | 6.56                     | 3.50                    | 3.90                    |
| Ti <sub>2</sub> NM-sp <sup>2</sup> sp <sup>3</sup> sp <sup>2</sup> -c  | 1.54                  | 6.82                     | 4.33                    | 4.85                    |
| V <sub>2</sub> NM-sp <sup>2</sup> sp <sup>3</sup> sp <sup>2</sup> -c   | 1.63                  | 6.74                     | 4.30                    | 5.31                    |
| Cr <sub>2</sub> AFM-sp <sup>2</sup> sp <sup>3</sup> sp <sup>2</sup> -c | 1.66                  | 6.77                     | 4.50                    | 4.10                    |
| Cr <sub>2</sub> FM-sp <sup>2</sup> sp <sup>3</sup> sp <sup>2</sup> -c  | 1.66                  | 6.77                     | 4.50                    | 4.10                    |
| Mn <sub>2</sub> AFM-sp <sup>2</sup> sp <sup>3</sup> sp <sup>2</sup> -c | 1.55                  | 7.43                     | 4.10                    | 2.92                    |
| Mn <sub>2</sub> FM-sp <sup>2</sup> sp <sup>3</sup> sp <sup>2</sup> -c  | 1.55                  | 7.43                     | 4.10                    | 2.92                    |
| Fe <sub>2</sub> AFM-sp <sup>2</sup> sp <sup>3</sup> sp <sup>2</sup> -c | 1.83                  | 7.87                     | 4.81                    | 4.28                    |
| Fe <sub>2</sub> FM-sp <sup>2</sup> sp <sup>3</sup> sp <sup>2</sup> -c  | 1.83                  | 7.87                     | 4.81                    | 4.28                    |
| Co <sub>2</sub> AFM-sp <sup>2</sup> sp <sup>3</sup> sp <sup>2</sup> -c | 1.88                  | 7.88                     | 5.00                    | 4.39                    |
| Co <sub>2</sub> FM-sp <sup>2</sup> sp <sup>3</sup> sp <sup>2</sup> -c  | 1.88                  | 7.88                     | 5.00                    | 4.39                    |
| Ni <sub>2</sub> NM-sp <sup>2</sup> sp <sup>3</sup> sp <sup>2</sup> -c  | 1.91                  | 7.63                     | 5.35                    | 4.44                    |
| Cu <sub>2</sub> NM-sp <sup>2</sup> sp <sup>3</sup> sp <sup>2</sup> -c  | 1.9                   | 7.72                     | 5.10                    | 3.49                    |
| V <sub>2</sub> AFM-sp <sup>2</sup> sp <sup>3</sup> sp <sup>2</sup> -t  | 1.63                  | 6.74                     | 4.30                    | 5.31                    |
| V <sub>2</sub> FM-sp <sup>2</sup> sp <sup>3</sup> sp <sup>2</sup> -t   | 1.63                  | 6.74                     | 4.30                    | 5.31                    |
| Mn <sub>2</sub> AFM-sp <sup>2</sup> sp <sup>3</sup> sp <sup>2</sup> -t | 1.55                  | 7.43                     | 4.10                    | 2.92                    |
| Mn <sub>2</sub> FM-sp <sup>2</sup> sp <sup>3</sup> sp <sup>2</sup> -t  | 1.55                  | 7.43                     | 4.10                    | 2.92                    |
| Co <sub>2</sub> NM-sp <sup>2</sup> sp <sup>3</sup> sp <sup>2</sup> -t  | 1.88                  | 7.88                     | 5.00                    | 4.39                    |
| Ti <sub>2</sub> FM-sp <sup>3</sup> sp <sup>2</sup> sp <sup>3</sup>     | 1.54                  | 6.82                     | 4.33                    | 4.85                    |
| V <sub>2</sub> NM-sp <sup>3</sup> sp <sup>2</sup> sp <sup>3</sup>      | 1.63                  | 6.74                     | 4.30                    | 5.31                    |
| Cr <sub>2</sub> AFM-sp <sup>3</sup> sp <sup>2</sup> sp <sup>3</sup>    | 1.66                  | 6.77                     | 4.50                    | 4.10                    |
| Cr <sub>2</sub> FM-sp <sup>3</sup> sp <sup>2</sup> sp <sup>3</sup>     | 1.66                  | 6.77                     | 4.50                    | 4.10                    |
| Mn <sub>2</sub> AFM-sp <sup>3</sup> sp <sup>2</sup> sp <sup>3</sup>    | 1.55                  | 7.43                     | 4.10                    | 2.92                    |
| Mn <sub>2</sub> FM-sp <sup>3</sup> sp <sup>2</sup> sp <sup>3</sup>     | 1.55                  | 7.43                     | 4.10                    | 2.92                    |
| Fe <sub>2</sub> AFM-sp <sup>3</sup> sp <sup>2</sup> sp <sup>3</sup>    | 1.83                  | 7.87                     | 4.81                    | 4.28                    |
| Fe <sub>2</sub> FM-sp <sup>3</sup> sp <sup>2</sup> sp <sup>3</sup>     | 1.83                  | 7.87                     | 4.81                    | 4.28                    |
| Co <sub>2</sub> NM-sp <sup>3</sup> sp <sup>2</sup> sp <sup>3</sup>     | 1.88                  | 7.88                     | 5.00                    | 4.39                    |
| Ni <sub>2</sub> NM-sp <sup>3</sup> sp <sup>2</sup> sp <sup>3</sup>     | 1.91                  | 7.63                     | 5.35                    | 4.44                    |

| <b>PG-based DACs</b>                                                   | $r_{\text{atomic}}$ | $V_{\text{atomic}}$ | $m$   | $N_s$ |
|------------------------------------------------------------------------|---------------------|---------------------|-------|-------|
| Sc <sub>2</sub> NM-sp <sup>2</sup> sp <sup>3</sup>                     | 1.44                | 12.57               | 44.96 | 2     |
| Ti <sub>2</sub> NM-sp <sup>2</sup> sp <sup>3</sup>                     | 1.47                | 10.63               | 47.87 | 2     |
| V <sub>2</sub> FM-sp <sup>2</sup> sp <sup>3</sup>                      | 1.53                | 9.83                | 50.94 | 2     |
| Mn <sub>2</sub> AFM-sp <sup>2</sup> sp <sup>3</sup>                    | 1.39                | 8.06                | 54.94 | 2     |
| Mn <sub>2</sub> FM-sp <sup>2</sup> sp <sup>3</sup>                     | 1.39                | 8.06                | 54.94 | 2     |
| Fe <sub>2</sub> AFM-sp <sup>2</sup> sp <sup>3</sup>                    | 1.32                | 7.11                | 55.85 | 2     |
| Fe <sub>2</sub> FM-sp <sup>2</sup> sp <sup>3</sup>                     | 1.32                | 7.11                | 55.85 | 2     |
| Sc <sub>2</sub> NM-sp <sup>2</sup> sp <sup>3</sup> sp <sup>2</sup> -c  | 1.44                | 12.57               | 44.96 | 2     |
| Ti <sub>2</sub> NM-sp <sup>2</sup> sp <sup>3</sup> sp <sup>2</sup> -c  | 1.47                | 10.63               | 47.87 | 2     |
| V <sub>2</sub> NM-sp <sup>2</sup> sp <sup>3</sup> sp <sup>2</sup> -c   | 1.53                | 9.83                | 50.94 | 2     |
| Cr <sub>2</sub> AFM-sp <sup>2</sup> sp <sup>3</sup> sp <sup>2</sup> -c | 1.52                | 8.65                | 52    | 2     |
| Cr <sub>2</sub> FM-sp <sup>2</sup> sp <sup>3</sup> sp <sup>2</sup> -c  | 1.52                | 8.65                | 52    | 2     |
| Mn <sub>2</sub> AFM-sp <sup>2</sup> sp <sup>3</sup> sp <sup>2</sup> -c | 1.39                | 8.06                | 54.94 | 2     |
| Mn <sub>2</sub> FM-sp <sup>2</sup> sp <sup>3</sup> sp <sup>2</sup> -c  | 1.39                | 8.06                | 54.94 | 2     |
| Fe <sub>2</sub> AFM-sp <sup>2</sup> sp <sup>3</sup> sp <sup>2</sup> -c | 1.32                | 7.11                | 55.85 | 2     |
| Fe <sub>2</sub> FM-sp <sup>2</sup> sp <sup>3</sup> sp <sup>2</sup> -c  | 1.32                | 7.11                | 55.85 | 2     |
| Co <sub>2</sub> AFM-sp <sup>2</sup> sp <sup>3</sup> sp <sup>2</sup> -c | 1.26                | 6.61                | 58.93 | 2     |
| Co <sub>2</sub> FM-sp <sup>2</sup> sp <sup>3</sup> sp <sup>2</sup> -c  | 1.26                | 6.61                | 58.93 | 2     |
| Ni <sub>2</sub> NM-sp <sup>2</sup> sp <sup>3</sup> sp <sup>2</sup> -c  | 1.24                | 6.59                | 58.69 | 2     |
| Cu <sub>2</sub> NM-sp <sup>2</sup> sp <sup>3</sup> sp <sup>2</sup> -c  | 1.28                | 6.53                | 63.55 | 2     |
| V <sub>2</sub> AFM-sp <sup>2</sup> sp <sup>3</sup> sp <sup>2</sup> -t  | 1.53                | 9.83                | 50.94 | 2     |
| V <sub>2</sub> FM-sp <sup>2</sup> sp <sup>3</sup> sp <sup>2</sup> -t   | 1.53                | 9.83                | 50.94 | 2     |
| Mn <sub>2</sub> AFM-sp <sup>2</sup> sp <sup>3</sup> sp <sup>2</sup> -t | 1.39                | 8.06                | 54.94 | 2     |
| Mn <sub>2</sub> FM-sp <sup>2</sup> sp <sup>3</sup> sp <sup>2</sup> -t  | 1.39                | 8.06                | 54.94 | 2     |
| Co <sub>2</sub> NM-sp <sup>2</sup> sp <sup>3</sup> sp <sup>2</sup> -t  | 1.26                | 6.61                | 58.93 | 2     |
| Ti <sub>2</sub> FM-sp <sup>3</sup> sp <sup>2</sup> sp <sup>3</sup>     | 1.47                | 10.63               | 47.87 | 2     |
| V <sub>2</sub> NM-sp <sup>3</sup> sp <sup>2</sup> sp <sup>3</sup>      | 1.53                | 9.83                | 50.94 | 2     |
| Cr <sub>2</sub> AFM-sp <sup>3</sup> sp <sup>2</sup> sp <sup>3</sup>    | 1.52                | 8.65                | 52.00 | 2     |
| Cr <sub>2</sub> FM-sp <sup>3</sup> sp <sup>2</sup> sp <sup>3</sup>     | 1.52                | 8.65                | 52.00 | 2     |
| Mn <sub>2</sub> AFM-sp <sup>3</sup> sp <sup>2</sup> sp <sup>3</sup>    | 1.39                | 8.06                | 54.94 | 2     |
| Mn <sub>2</sub> FM-sp <sup>3</sup> sp <sup>2</sup> sp <sup>3</sup>     | 1.39                | 8.06                | 54.94 | 2     |
| Fe <sub>2</sub> AFM-sp <sup>3</sup> sp <sup>2</sup> sp <sup>3</sup>    | 1.32                | 7.11                | 55.85 | 2     |
| Fe <sub>2</sub> FM-sp <sup>3</sup> sp <sup>2</sup> sp <sup>3</sup>     | 1.32                | 7.11                | 55.85 | 2     |
| Co <sub>2</sub> NM-sp <sup>3</sup> sp <sup>2</sup> sp <sup>3</sup>     | 1.26                | 6.61                | 58.93 | 2     |
| Ni <sub>2</sub> NM-sp <sup>3</sup> sp <sup>2</sup> sp <sup>3</sup>     | 1.24                | 6.59                | 58.69 | 2     |

| <b>PG-based DACs</b>                                                   | $N_d$ | $N_{\text{valence}}$ | $Bond_{\text{TM1-TM2}}$ | $\Delta G^*_{\text{CO}_2}$ |
|------------------------------------------------------------------------|-------|----------------------|-------------------------|----------------------------|
| Sc <sub>2</sub> NM-sp <sup>2</sup> sp <sup>3</sup>                     | 1     | 3                    | 2.964                   | -0.485                     |
| Ti <sub>2</sub> NM-sp <sup>2</sup> sp <sup>3</sup>                     | 2     | 4                    | 2.879                   | -0.557                     |
| V <sub>2</sub> FM-sp <sup>2</sup> sp <sup>3</sup>                      | 3     | 5                    | 2.597                   | -0.212                     |
| Mn <sub>2</sub> AFM-sp <sup>2</sup> sp <sup>3</sup>                    | 5     | 7                    | 2.554                   | -0.234                     |
| Mn <sub>2</sub> FM-sp <sup>2</sup> sp <sup>3</sup>                     | 5     | 7                    | 2.724                   | -0.177                     |
| Fe <sub>2</sub> AFM-sp <sup>2</sup> sp <sup>3</sup>                    | 6     | 8                    | 2.100                   | 0.9136                     |
| Fe <sub>2</sub> FM-sp <sup>2</sup> sp <sup>3</sup>                     | 6     | 8                    | 2.031                   | 0.752                      |
| Sc <sub>2</sub> NM-sp <sup>2</sup> sp <sup>3</sup> sp <sup>2</sup> -c  | 1     | 3                    | 2.927                   | -0.423                     |
| Ti <sub>2</sub> NM-sp <sup>2</sup> sp <sup>3</sup> sp <sup>2</sup> -c  | 2     | 4                    | 2.603                   | -0.518                     |
| V <sub>2</sub> NM-sp <sup>2</sup> sp <sup>3</sup> sp <sup>2</sup> -c   | 3     | 5                    | 2.198                   | -0.537                     |
| Cr <sub>2</sub> AFM-sp <sup>2</sup> sp <sup>3</sup> sp <sup>2</sup> -c | 4     | 6                    | 2.238                   | -0.390                     |
| Cr <sub>2</sub> FM-sp <sup>2</sup> sp <sup>3</sup> sp <sup>2</sup> -c  | 4     | 6                    | 2.401                   | -0.474                     |
| Mn <sub>2</sub> AFM-sp <sup>2</sup> sp <sup>3</sup> sp <sup>2</sup> -c | 5     | 7                    | 2.368                   | -0.237                     |
| Mn <sub>2</sub> FM-sp <sup>2</sup> sp <sup>3</sup> sp <sup>2</sup> -c  | 5     | 7                    | 2.443                   | -0.362                     |
| Fe <sub>2</sub> AFM-sp <sup>2</sup> sp <sup>3</sup> sp <sup>2</sup> -c | 6     | 8                    | 2.250                   | -0.324                     |
| Fe <sub>2</sub> FM-sp <sup>2</sup> sp <sup>3</sup> sp <sup>2</sup> -c  | 6     | 8                    | 2.265                   | -0.171                     |
| Co <sub>2</sub> AFM-sp <sup>2</sup> sp <sup>3</sup> sp <sup>2</sup> -c | 7     | 9                    | 2.239                   | -0.567                     |
| Co <sub>2</sub> FM-sp <sup>2</sup> sp <sup>3</sup> sp <sup>2</sup> -c  | 7     | 9                    | 2.198                   | -0.430                     |
| Ni <sub>2</sub> NM-sp <sup>2</sup> sp <sup>3</sup> sp <sup>2</sup> -c  | 8     | 10                   | 2.377                   | -0.215                     |
| Cu <sub>2</sub> NM-sp <sup>2</sup> sp <sup>3</sup> sp <sup>2</sup> -c  | 9     | 11                   | 2.522                   | -0.052                     |
| V <sub>2</sub> AFM-sp <sup>2</sup> sp <sup>3</sup> sp <sup>2</sup> -t  | 3     | 5                    | 2.336                   | -0.622                     |
| V <sub>2</sub> FM-sp <sup>2</sup> sp <sup>3</sup> sp <sup>2</sup> -t   | 3     | 5                    | 2.365                   | -0.623                     |
| Mn <sub>2</sub> AFM-sp <sup>2</sup> sp <sup>3</sup> sp <sup>2</sup> -t | 5     | 7                    | 2.311                   | -0.337                     |
| Mn <sub>2</sub> FM-sp <sup>2</sup> sp <sup>3</sup> sp <sup>2</sup> -t  | 5     | 7                    | 2.379                   | -0.373                     |
| Co <sub>2</sub> NM-sp <sup>2</sup> sp <sup>3</sup> sp <sup>2</sup> -t  | 7     | 9                    | 2.302                   | -0.601                     |
| Ti <sub>2</sub> FM-sp <sup>3</sup> sp <sup>2</sup> sp <sup>3</sup>     | 2     | 4                    | 2.659                   | -0.32                      |
| V <sub>2</sub> NM-sp <sup>3</sup> sp <sup>2</sup> sp <sup>3</sup>      | 3     | 5                    | 2.478                   | -0.116                     |
| Cr <sub>2</sub> AFM-sp <sup>3</sup> sp <sup>2</sup> sp <sup>3</sup>    | 4     | 6                    | 2.583                   | -0.133                     |
| Cr <sub>2</sub> FM-sp <sup>3</sup> sp <sup>2</sup> sp <sup>3</sup>     | 4     | 6                    | 2.587                   | -0.239                     |
| Mn <sub>2</sub> AFM-sp <sup>3</sup> sp <sup>2</sup> sp <sup>3</sup>    | 5     | 7                    | 2.306                   | -0.198                     |
| Mn <sub>2</sub> FM-sp <sup>3</sup> sp <sup>2</sup> sp <sup>3</sup>     | 5     | 7                    | 2.489                   | -0.065                     |
| Fe <sub>2</sub> AFM-sp <sup>3</sup> sp <sup>2</sup> sp <sup>3</sup>    | 6     | 8                    | 2.232                   | -0.091                     |
| Fe <sub>2</sub> FM-sp <sup>3</sup> sp <sup>2</sup> sp <sup>3</sup>     | 6     | 8                    | 2.216                   | -0.121                     |
| Co <sub>2</sub> NM-sp <sup>3</sup> sp <sup>2</sup> sp <sup>3</sup>     | 7     | 9                    | 2.304                   | -0.306                     |
| Ni <sub>2</sub> NM-sp <sup>3</sup> sp <sup>2</sup> sp <sup>3</sup>     | 8     | 10                   | 2.217                   | -0.170                     |

**Table S5.** Structural and electronic descriptors used as input features in the machine learning models for PG-based DACs.

| Symbol                    | Descriptor                                                         |
|---------------------------|--------------------------------------------------------------------|
| $Q_{\text{TM}}$           | Bader charge of dual-atom center                                   |
| $\varepsilon_{\text{d}}$  | $d$ -band center of dual-atom center                               |
| ICOHP                     | Integrated crystal orbital Hamilton population of dual-atom center |
| $Z$                       | Atomic number                                                      |
| $P$                       | Electronegativity                                                  |
| $IE_1$                    | First ionization energy                                            |
| $W_{\text{M}}$            | Work function of metal                                             |
| $E_{\text{M}}$            | Cohesive energy of metal                                           |
| $r_{\text{atomic}}$       | Atomic radius                                                      |
| $V_{\text{atomic}}$       | Molar atomic volume                                                |
| $m$                       | Relative atomic mass                                               |
| $N_{\text{s}}$            | Valence $s$ electron count                                         |
| $N_{\text{d}}$            | Valence $d$ -electron count                                        |
| $N_{\text{valence}}$      | Total valence electron count                                       |
| $Bond_{\text{TM1-TM2}}$   | Metal-metal distance at active site                                |
| $\Delta G_{*\text{CO}_2}$ | $\text{CO}_2$ adsorption free energy                               |

**Note:** Elemental quantities ( $Z$ ,  $P$ ,  $IE_1$ ,  $W_{\text{M}}$ ,  $E_{\text{M}}$ ,  $r_{\text{atomic}}$ ,  $V_{\text{atomic}}$ ,  $m$ ,  $N_{\text{s}}$ ,  $N_{\text{d}}$ ,  $N_{\text{valence}}$ ) are taken from standard elemental data for the corresponding transition metal, while site specific quantities ( $Q_{\text{TM}}$ ,  $\varepsilon_{\text{d}}$ , ICOHP,  $Bond_{\text{TM1-TM2}}$ ,  $\Delta G_{*\text{CO}_2}$ ) are obtained from DFT

calculations of the PG-based DACs.

**Table S6.** Machine-learning models and hyperparameters.

| <b>Model</b> | <b>Implementation summary</b>                                                                         | <b>Hyperparameters</b>                                                                                                                    |
|--------------|-------------------------------------------------------------------------------------------------------|-------------------------------------------------------------------------------------------------------------------------------------------|
| Poly-Ridge   | Polynomial feature expansion + standardization + Ridge regression                                     | degree = 2<br>include_bias = False<br>interaction_only = False<br>alpha = 1.631<br>solver = saga<br>max_iter = 20000<br>random_state = 42 |
| RBF-NuSVR    | Standardization + v-support vector regression with RBF kernel                                         | C = 5.829<br>nu = 0.759<br>gamma = 0.026                                                                                                  |
| Note         | A Yeo–Johnson transformation was applied to the target variable during fitting of the RBF-NuSVR model |                                                                                                                                           |

## Supplementary Figures

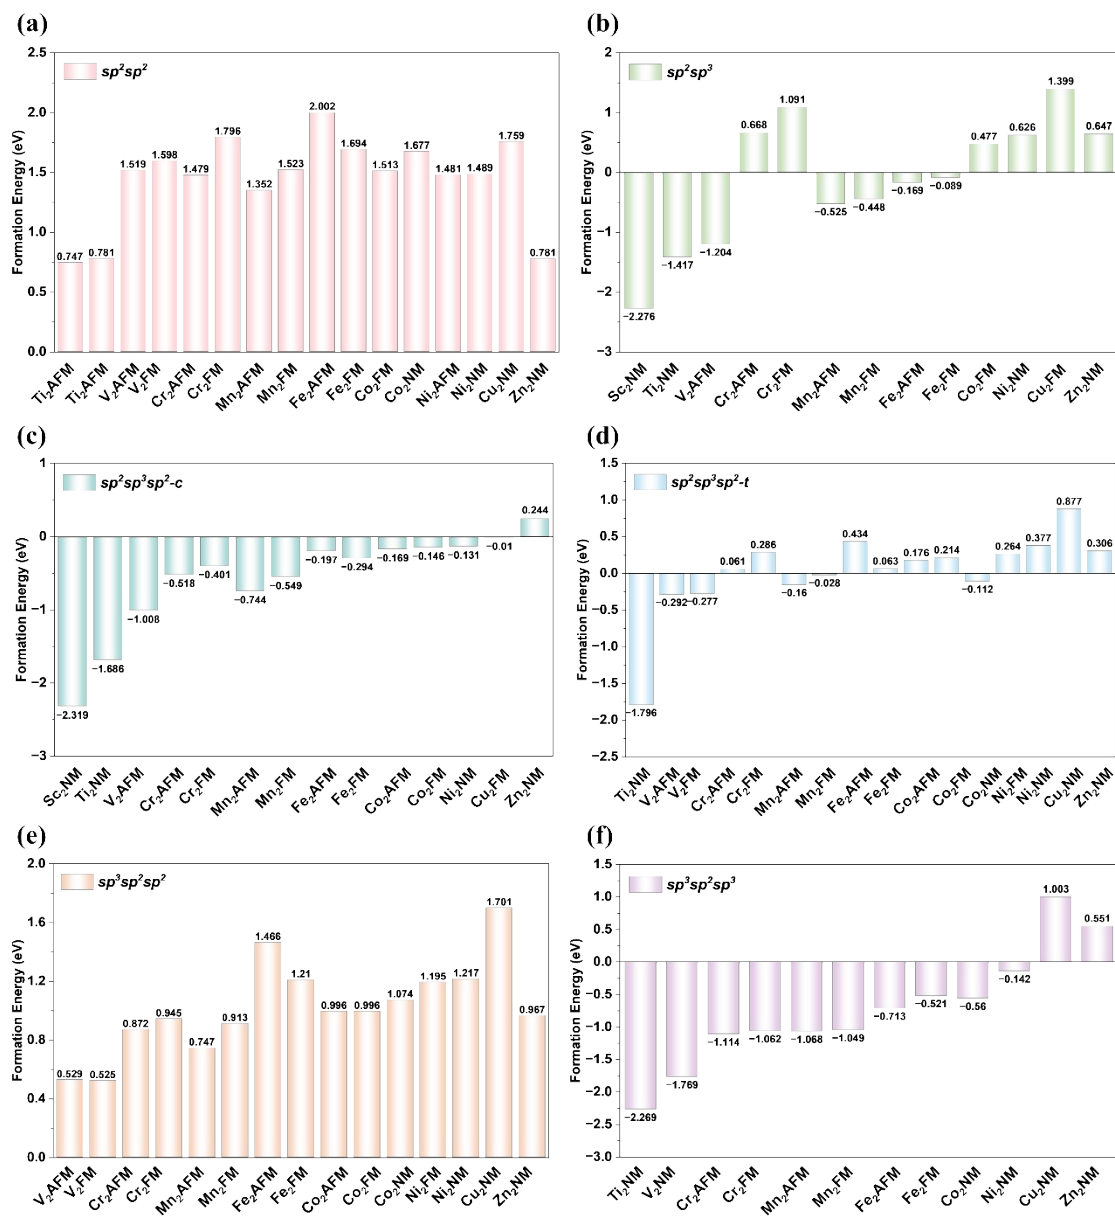

**Figure S1.** Formation energies of 86 PG-based DACs relative to the vacant PG substrate and bulk metal reference.

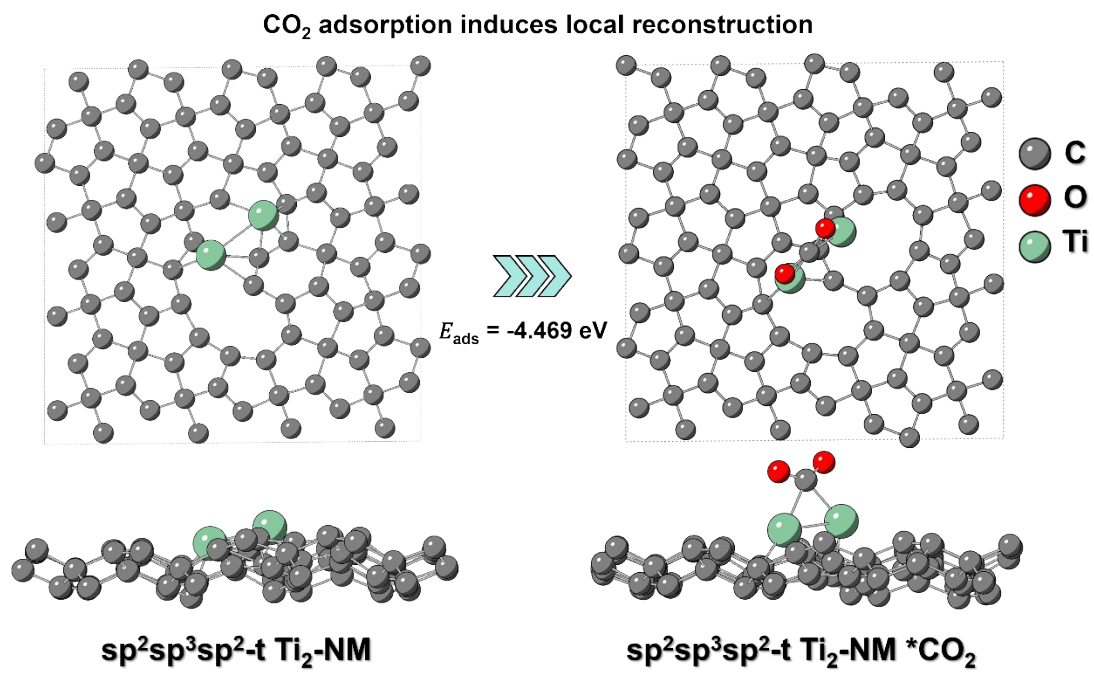

**Figure S2.** Structural evolution of sp<sup>2</sup>sp<sup>3</sup>sp<sup>2</sup>-t Ti<sub>2</sub>-NM upon CO<sub>2</sub> adsorption.

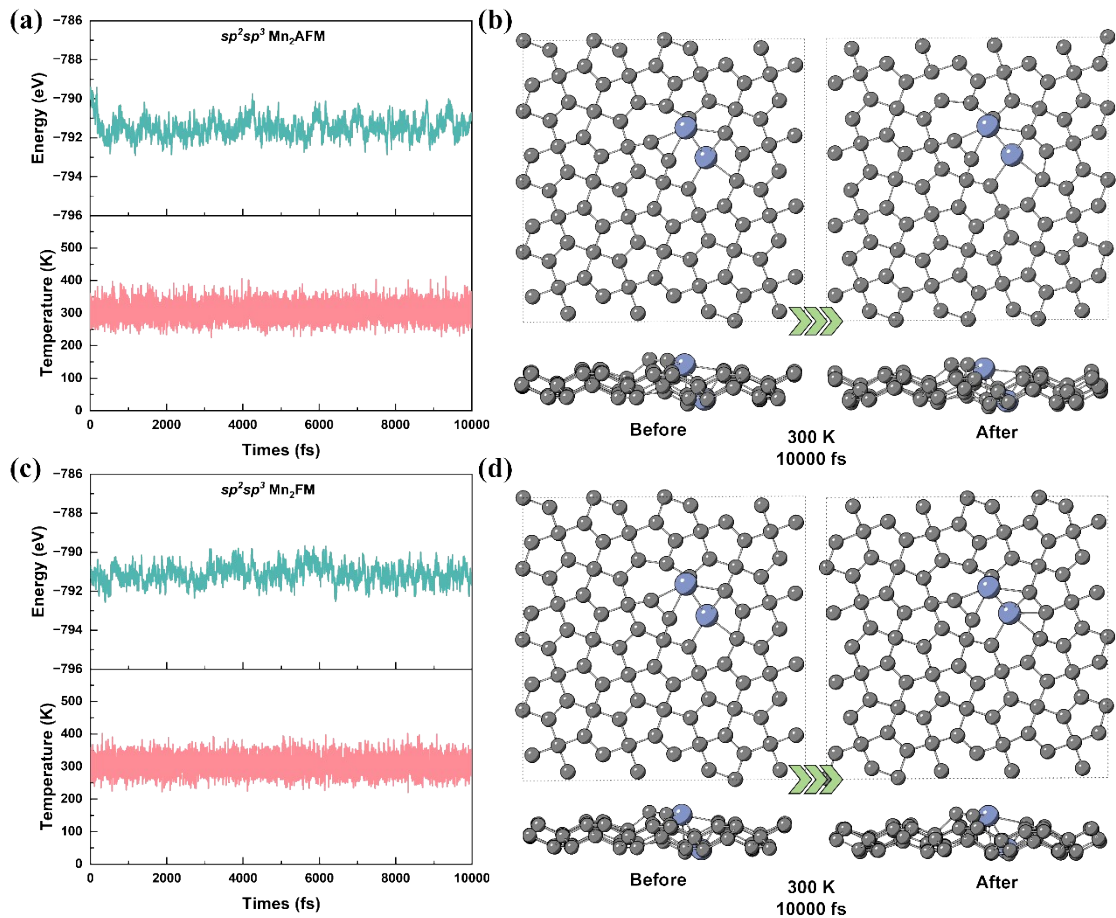

**Figure S3.** (a) and (c) Variation of total energy and temperature of PG-based  $sp^2sp^3$  Mn<sub>2</sub>AFM and Mn<sub>2</sub>FM for 10000 fs during MD simulation at 300 K; (b) and (d) The Geometry snapshot of the initial and final states of PG-based  $sp^2sp^3$  Mn<sub>2</sub>AFM and Mn<sub>2</sub>FM.

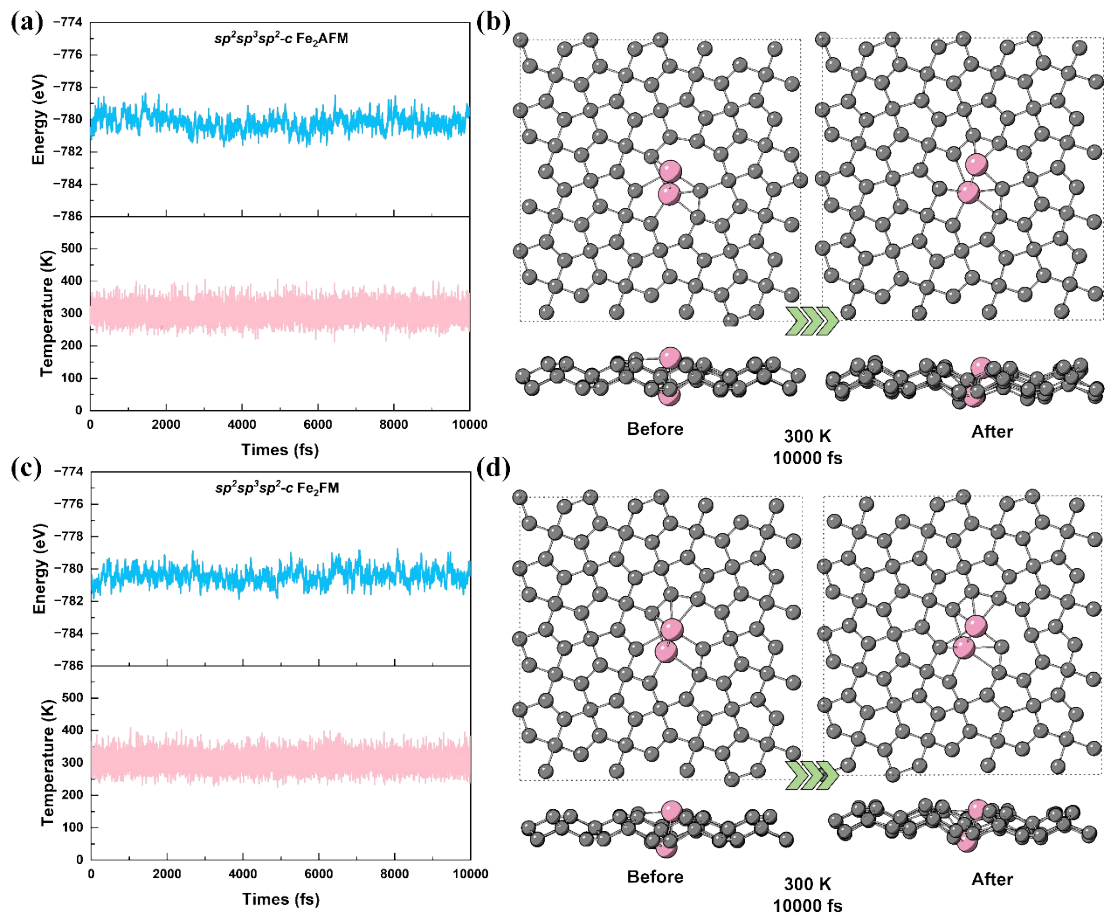

**Figure S4.** (a) and (c) Variation of total energy and temperature of PG-based  $sp^2sp^3sp^2$ -c  $Fe_2AFM$  and  $Fe_2FM$  for 10000 fs during MD simulation at 300 K; (b) and (d) The Geometry snapshot of the initial and final states of PG-based  $sp^2sp^3sp^2$ -c  $Fe_2AFM$  and  $Fe_2FM$ .

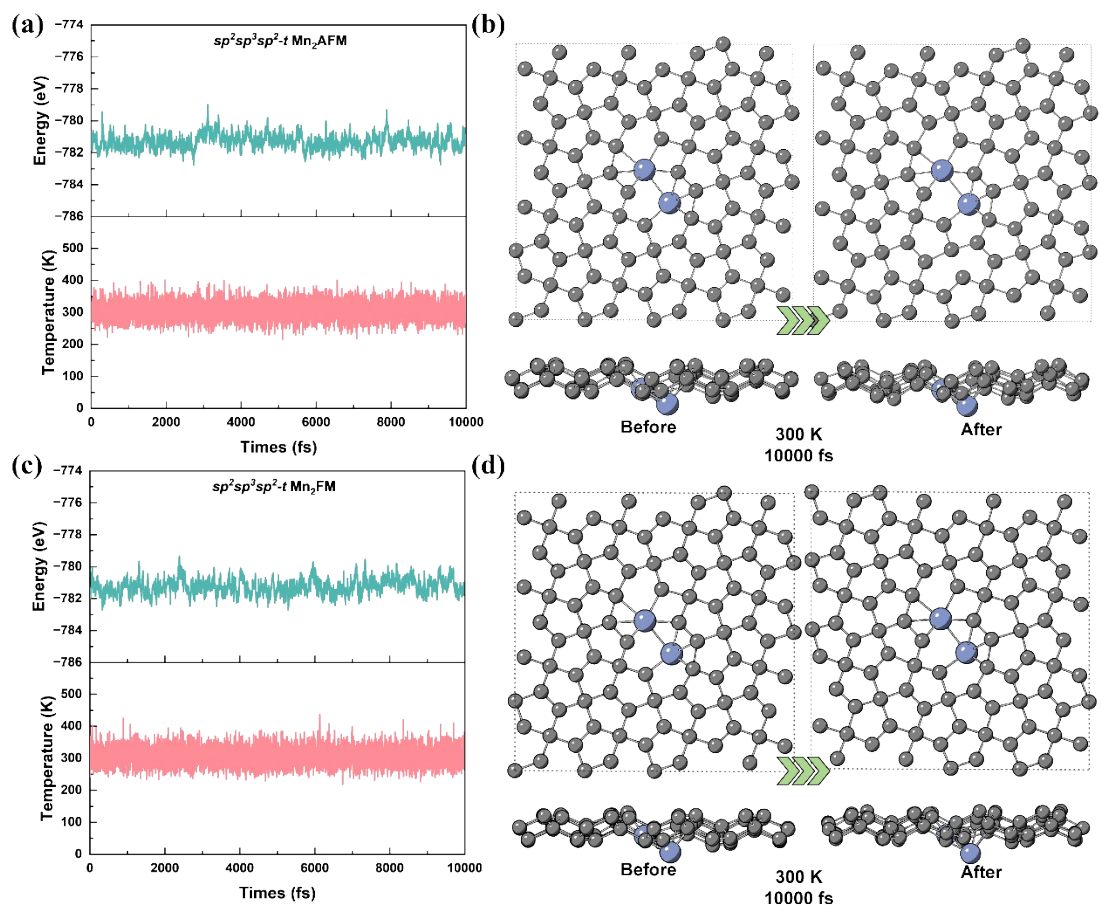

**Figure S5.** (a) and (c) Variation of total energy and temperature of PG-based  $sp^2sp^3sp^2-t$  Mn<sub>2</sub>AFM and Mn<sub>2</sub>FM for 10000 fs during MD simulation at 300 K; (b) and (d) The Geometry snapshot of the initial and final states of PG-based  $sp^2sp^3sp^2-t$  Mn<sub>2</sub>AFM and Mn<sub>2</sub>FM.

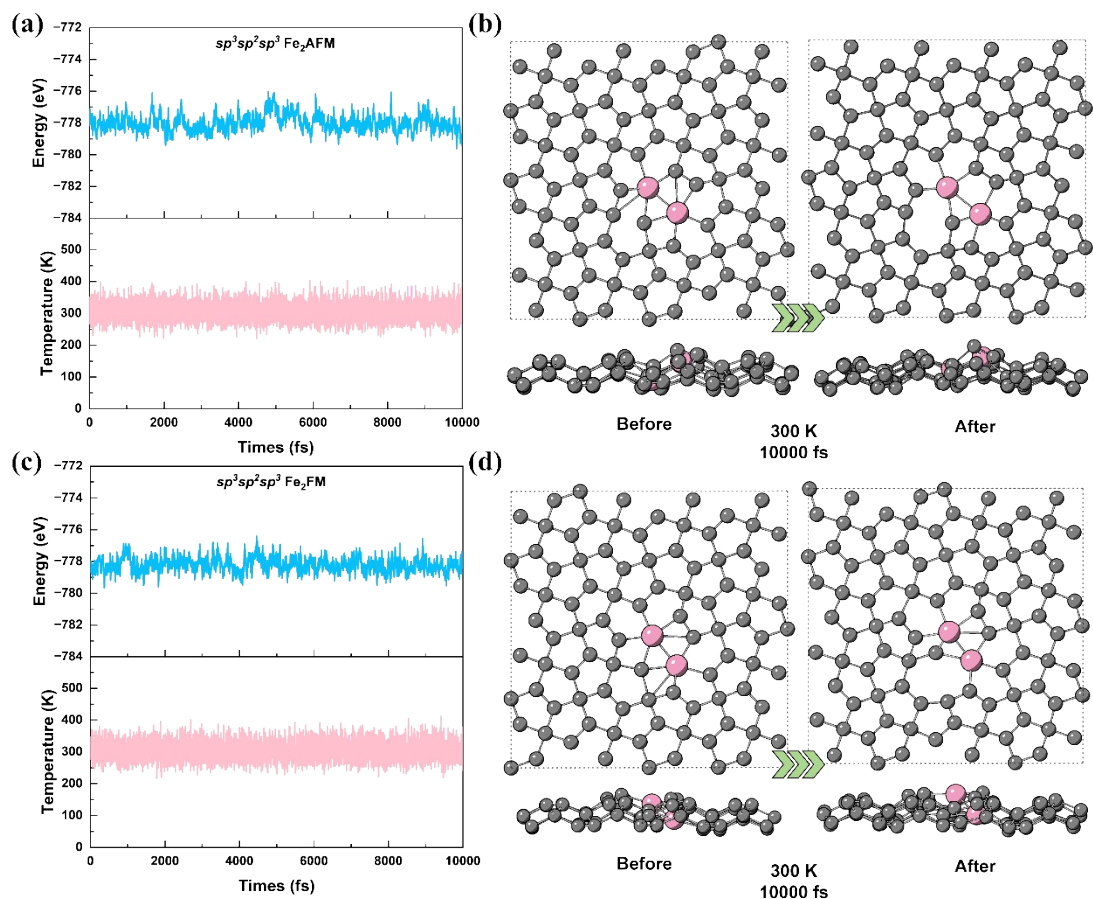

**Figure S6.** (a) and (c) Variation of total energy and temperature of PG-based  $sp^3sp^2sp^3$   $Fe_2AFM$  and  $Fe_2FM$  for 10000 fs during MD simulation at 300 K; (b) and (d) The Geometry snapshot of the initial and final states of PG-based  $sp^3sp^2sp^3$   $Fe_2AFM$  and  $Fe_2FM$ .

## References

- (1) Kattel, S.; Atanassov, P.; Kiefer, B. A density functional theory study of oxygen reduction reaction on non-PGM Fe-N-C electrocatalysts. *Phys. Chem. Chem. Phys.* **2014**, *16* (27), 13800–13806.
- (2) Norskov, J. K.; Abild-Pedersen, F.; Studt, F.; Bligaard, T. Density functional theory in surface chemistry and catalysis. *Proc. Natl. Acad. Sci. U. S. A.* **2011**, *108* (3), 937–943.
- (3) Guo, X.; Gu, J.; Lin, S.; Zhang, S.; Chen, Z.; Huang, S. Tackling the activity and selectivity challenges of electrocatalysts toward the nitrogen reduction reaction via atomically dispersed biatom catalysts. *J. Am. Chem. Soc.* **2020**, *142* (12), 5709–5721.
